# Supplementary material for: N-Doped Graphene as an Efficient Metal-Free Electrocatalyst for Indirect Nitrate Reduction Reaction
Source: MDPI journal article supplement (doi:10.3390/nano11092418), 2021-09-17
Supplement: s1 [file s1]

## Supporting Information

# N-Doped Graphene as an Efficient Metal-Free Electrocatalyst for Indirect Nitrate Reduction Reaction

Jujiao Zhao <sup>1</sup>, Bo Shang <sup>2</sup> and Jun Zhai <sup>1,\*</sup>

<sup>1</sup> College of Environment and Ecology & MOE Key Laboratory of the Three Gorges Reservoir Region's Eco-Environment, Chongqing University, Chongqing 400045, China; zhaojujiao@cqu.edu.cn

<sup>2</sup> School of Chemistry and Chemical Engineering & Chongqing Key Laboratory of Theoretical and Computational Chemistry, Chongqing University, Chongqing 401331, China; bshang@cqu.edu.cn

\* Correspondence: zhajun@cqu.edu.cn

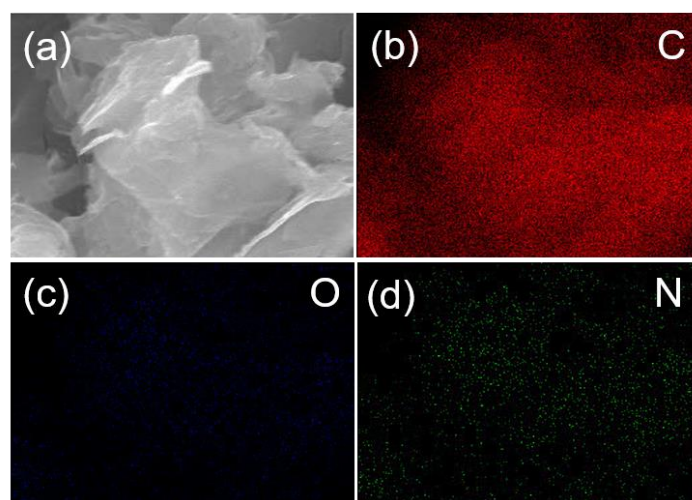

**Figure S1.** (a) SEM and (b-d) EDS mapping of C, O, and N in NGR1, respectively.

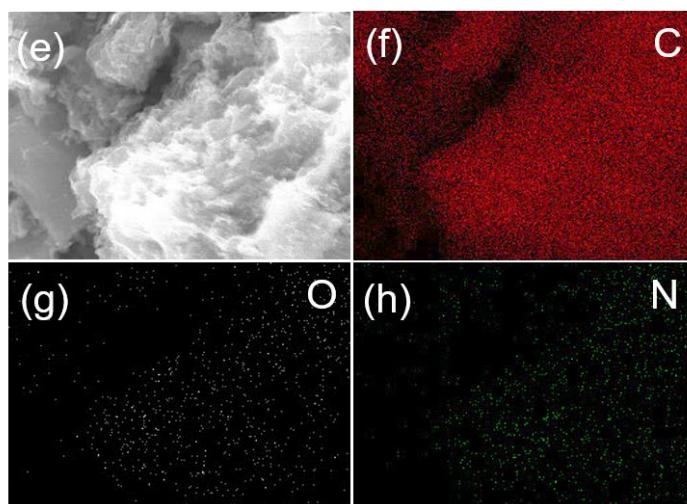

**Figure S2.** (a) SEM (b-d) EDS mapping of C, O, and N in NGR2, respectively.

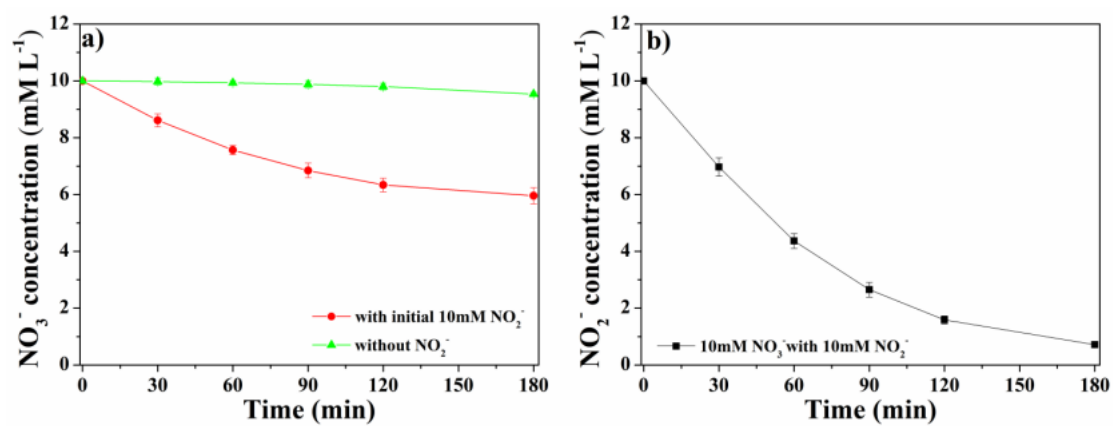

**Figure S3.** (a) Electrochemical reduction of  $\text{NO}_3^-$  on NGR2 at 0.6 V for 3 h, with and without initial 10 mM  $\text{NO}_2^-$  with a 5 M  $\text{H}_2\text{SO}_4$  electrolyte; (b), amount of  $\text{NO}_2^-$  on NGR2 at 0.6 V for 3 h with the initial 10 mM  $\text{NO}_2^-$  and 10 mM  $\text{NO}_3^-$ .

**Table S1** Summary of chemical composition analysis from XPS and Raman results and electrochemical properties of samples.

| <b>Sample</b> | <b>At% (C)</b> | <b>At% (O)</b> | <b>At % (N)</b> | <b>Pyridinic-N of total N (%)</b> | <b>Pyrrolic-N of total N (%)</b> | <b>Graphitic-N of total N (%)</b> | <b>I<sub>D</sub>/I<sub>G</sub></b> | <b>Onset Potential (V)</b> | <b>Half-wave Potential (V)</b> |
|---------------|----------------|----------------|-----------------|-----------------------------------|----------------------------------|-----------------------------------|------------------------------------|----------------------------|--------------------------------|
| GR            | 84.56          | 15.35          | n/a             | n/a                               | n/a                              | n/a                               | 0.983                              | 0.698                      | 0.506                          |
| NGR1          | 86.26          | 8.39           | 5.35            | 23                                | 50.9                             | 26.1                              | 0.989                              | 0.85                       | 0.732                          |
| NGR2          | 86.81          | 8              | 5.19            | 40.48                             | 29.34                            | 30.18                             | 0.993                              | 0.932                      | 0.833                          |

### Text S1 Computational details of the DFT calculations

The calculations were performed using spin-polarized DFT as implemented in VASP. We chose the projected augmented wave (PAW) potentials [1,2] to describe the ionic cores and took valence electrons into account using a plane wave basis set with a kinetic energy cutoff of 400 eV. Partial occupancies of the Kohn–Sham orbitals were allowed using the Gaussian smearing method and a width of 0.05 eV. The electronic energy was considered self-consistent when the energy change was smaller than 10<sup>−5</sup> eV. A geometry optimization was considered convergent when the force change was smaller than 0.02 eV/Å. Grimme’s DFT-D3 methodology [3] was used to describe the dispersion interactions.

The equilibrium lattice constant of hexagonal graphene unit cell separated by a vacuum layer in the depth of 20.00 Å was optimized to be  $a=2.468$  Å, when using a 15×15×1 Monkhorst–Pack k-point grid for Brillouin zone sampling. We then used it to construct a graphene sheet model with (5×5) periodicity in the x and y directions and 1 atomic layer in the z direction by a vacuum layer in the depth of 15 Å in order to separate the surface slab from its periodic duplicates. This graphene sheet model contained 50 C atoms. We constructed three graphene models. In model 1, six neighboring C atoms were removed from this model in order to mimic the vacant graphene. In model 2, one C atom on the edge of model 1 was replaced by N in order to mimic pyridinic-N on graphene. In model 3, one N atom was added to the edge of model 1 in order to mimic pyrrolic-N on graphene. During structural optimizations, the gamma point in the Brillouin zone was used for k-point sampling, and all atoms in the models were allowed to relax.

### References

- [1] Kresse, G.; Joubert, D. From Ultrasoft Pseudopotentials to the Projector Augmented-Wave Method. *Phys. Rev. B* 1999, 59, 1758-1775.
- [2] Blöchl, P. E. Projector Augmented-Wave Method. *Phys. Rev. B* 1994, 50, 17953–17979.
- [3] Grimme, S.; Antony, J.; Ehrlich, S.; Krieg, H. *J. Chem. Phys.* 2010, 132, 154104.

### Text S2 Detection of nitrate and nitrite

Nitrate: National Environmental Protection Standard of the People's Republic of China, Water Quality - Determination of Nitrate-nitrogen - Ultraviolet spectrophotometry, HJ/T 346-2007.

Nitrite: National Standard of the People's Republic of China, Water Quality - Determination of nitrogen (nitrite) - Spectrophotometric method, GB 7489-87.
